# Supplementary material for: A Short Peptide Hydrogel with High Stiffness Induced by 310‐Helices to β‐Sheet Transition in Water
Source: PubMed Central journal article supplement (PMC6839752; doi:10.1002/advs.201901173), 2019-09-10
Supplement: ADVS-6-1901173-s002.pdf [file ADVS-6-1901173-s002.pdf]

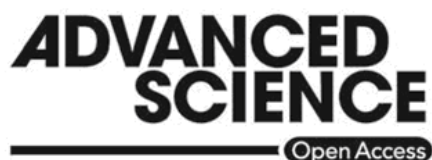

## Supporting Information

for *Adv. Sci.*, DOI: 10.1002/adv.201901173

A Short Peptide Hydrogel with High Stiffness Induced  
by  $3_{10}$ -Helices to  $\beta$ -Sheet Transition in Water

*Shu Hui Hiew, Harini Mohanram, Lulu Ning, Jingjing Guo,  
Antoni Sánchez-Ferrer, Xiangyan Shi, Konstantin Pervushin,  
Yuguang Mu, Raffaele Mezzenga, and Ali Miserez\**

# A Short Peptide Hydrogel with High Stiffness Induced by $3_{10}$ -Helices to $\beta$ -Sheet Transition in Water

*Shu Hui Hiew, Harini Mohanram, Lulu Ning, Jingjing Guo, Antoni Sánchez-Ferrer, Xiangyan Shi, Konstantin Pervushin, Yuguang Mu, Raffaele Mezzenga, and Ali Miserez\**

Dr. S.H. Hiew, Dr.H. Mohanram, Prof.A. Miserez.

Center for Biomimetic Sensor Science,  
School of Materials Science and Engineering,  
Nanyang Technological University,  
Singapore 639798, Singapore.  
E-mail: [ali.miserez@ntu.edu.sg](mailto:ali.miserez@ntu.edu.sg).

Dr.L. Ning, J. Guo, Dr. X.Shi, Prof. K. Pervushin, Prof. Y. Mu, Prof. A. Miserez.

School of Biological Sciences,  
Nanyang Technological University,  
Singapore 637551, Singapore.

Dr. A. Sánchez-Ferrer, Prof. R. Mezzenga.

Department of Health Sciences & Technology,  
ETH Zurich,  
Switzerland CH-8092, CH-8093.

Key-words: suckerin, peptide hydrogel,  $\beta$ -Sheet Transition, NMR spectroscopy, MD simulations.

## Supplementary Figures

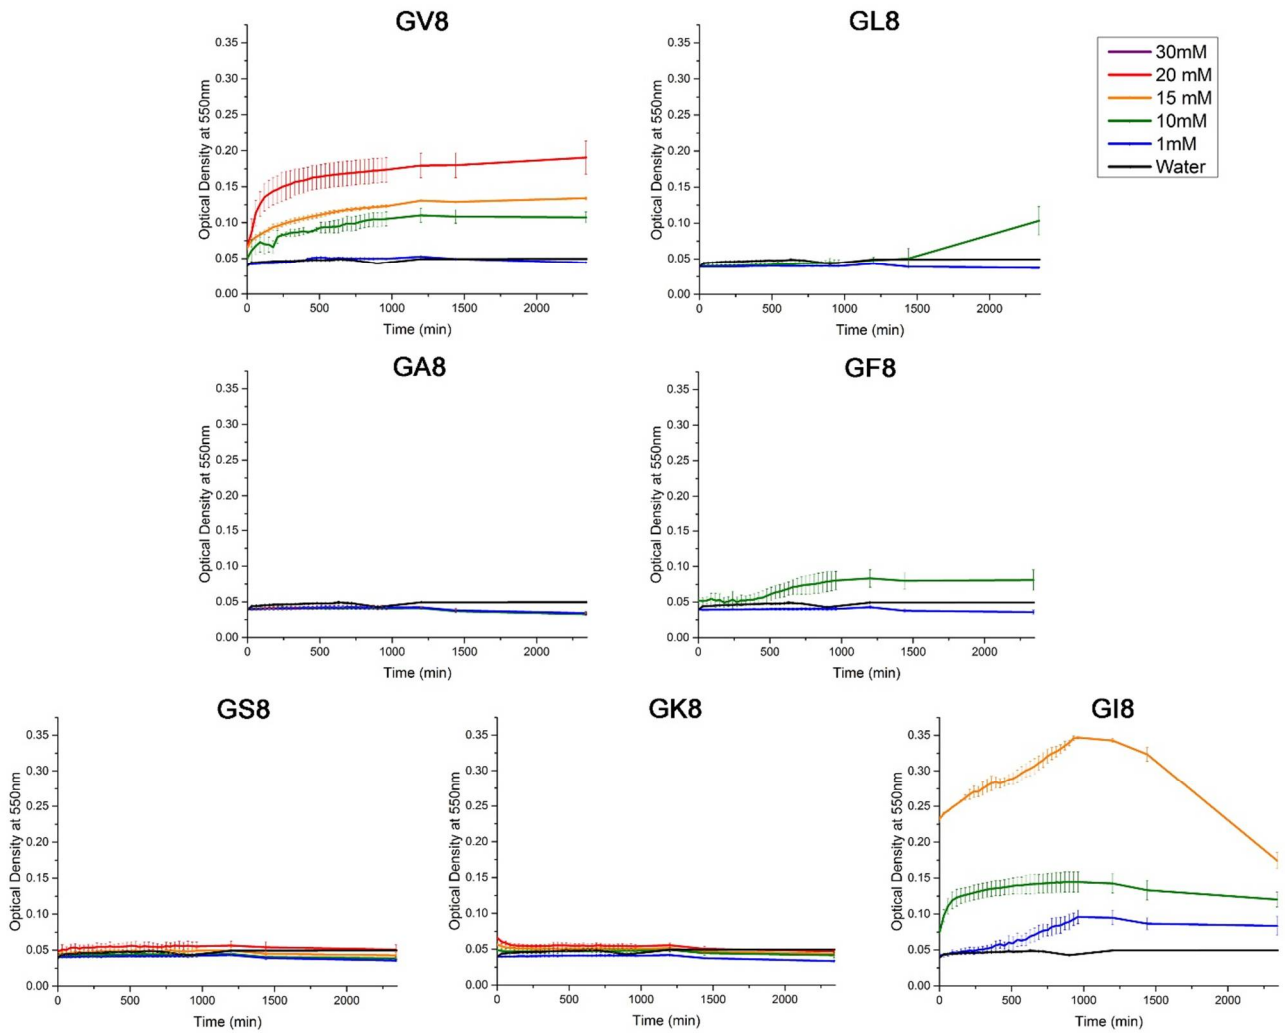

**Figure S1.** Gelation kinetics observed via optical density measurements of **GX8** peptide solutions. Peptides **GV8**, **GL8**, **GA8**, **GF8**, **GS8**, **GK8** and **GI8** were incubated in DI water at various concentrations over a period of 40 h and observed for gelation via their absorbance at 550 nm. Some sequences have higher solubilities than the others.

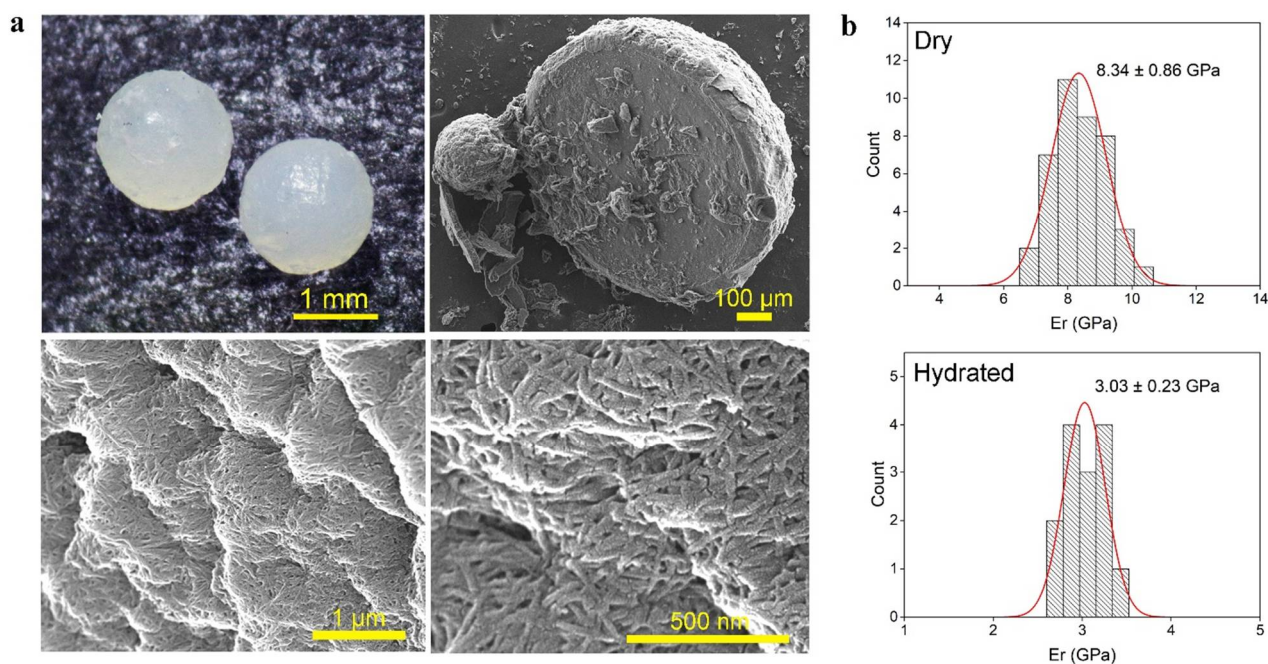

**Figure S2.** Bead-like structures formed by **GL8** peptide via self-assembly in DI water. a) Optical image of 2 beads formed by **GL8** peptide and SEM images showing the morphology and fibrous macro-scale assembly of the beads. b) Young's modulus obtained of **GL8** beads performed via nanoindentation in dried and hydrated conditions were 8.34 GPa and 3.03 GPa respectively.

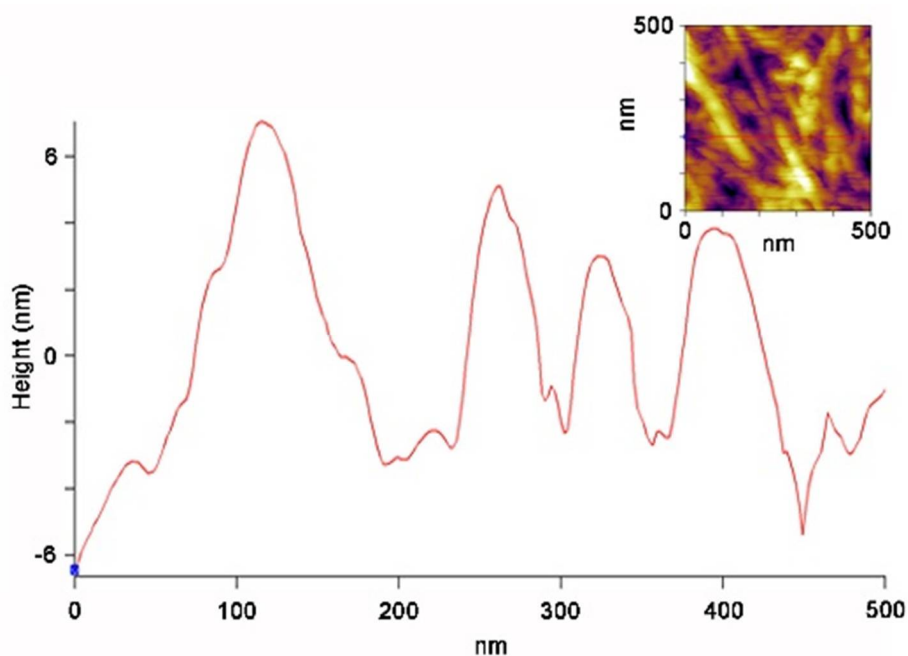

**Figure S3.** Topology of **GV8** hydrogel. Surface roughness plot across height profiles of dried **GV8** hydrogel samples measured via AFM revealed fibers of *ca.* 5-10 nm height.

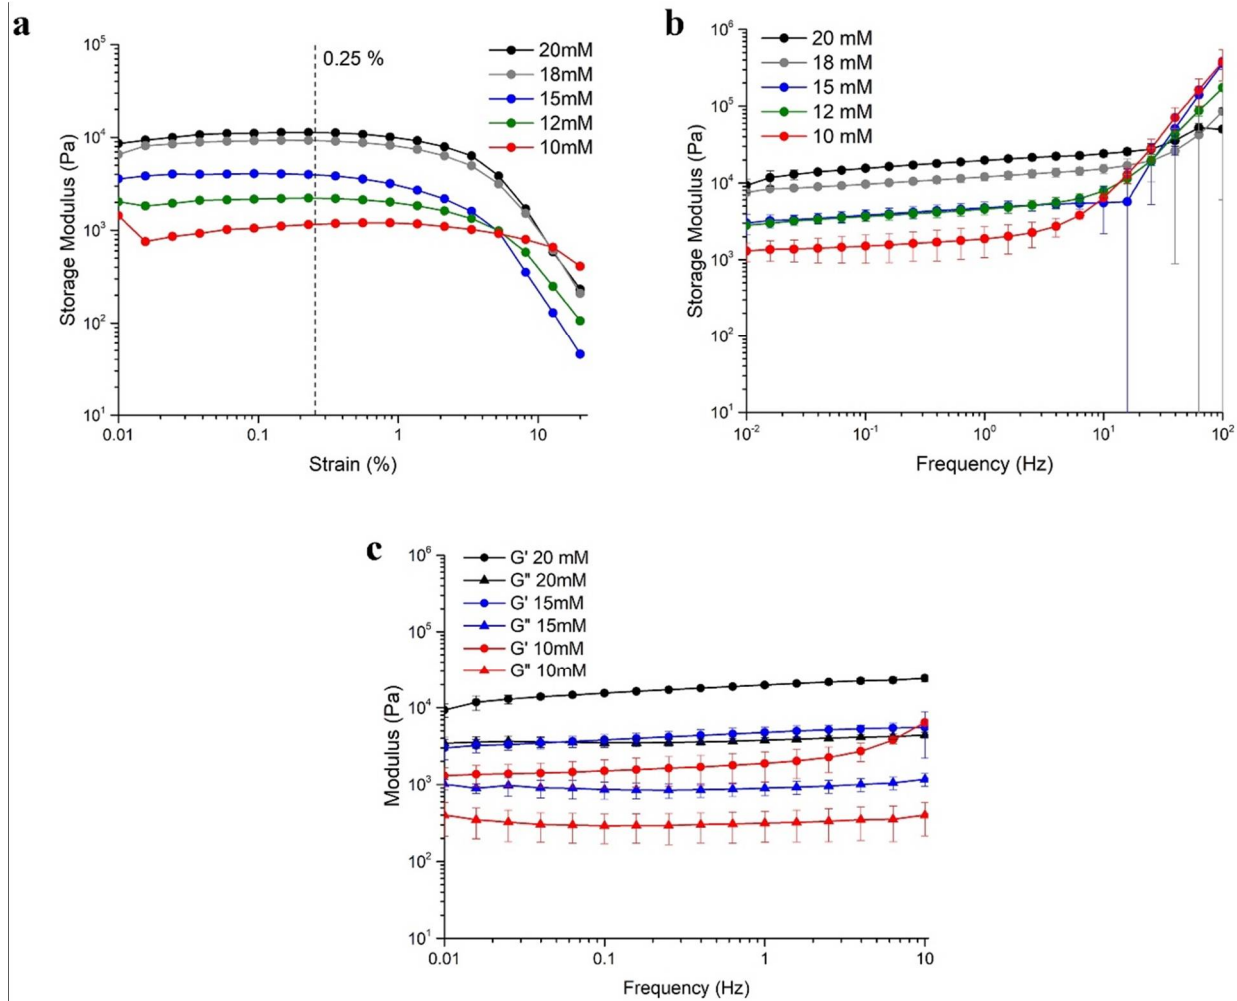

**Figure S4.** Rheological measurements of **GV8** hydrogels. a) Amplitude sweeps were performed on **GV8** hydrogels of different concentrations (20 mM, 18 mM, 15 mM, 12 mM and 10 mM) to identify their linear viscoelastic region (LVE). b) storage modulus,  $G'$ , obtained via frequency sweeps performed at 0.25 % strain with  $n = 3$ . c) plots of 3 **GV8** hydrogels at concentrations 20mM, 15mM and 10mM illustrating their gel characteristics  $G' > G''$  (loss modulus).

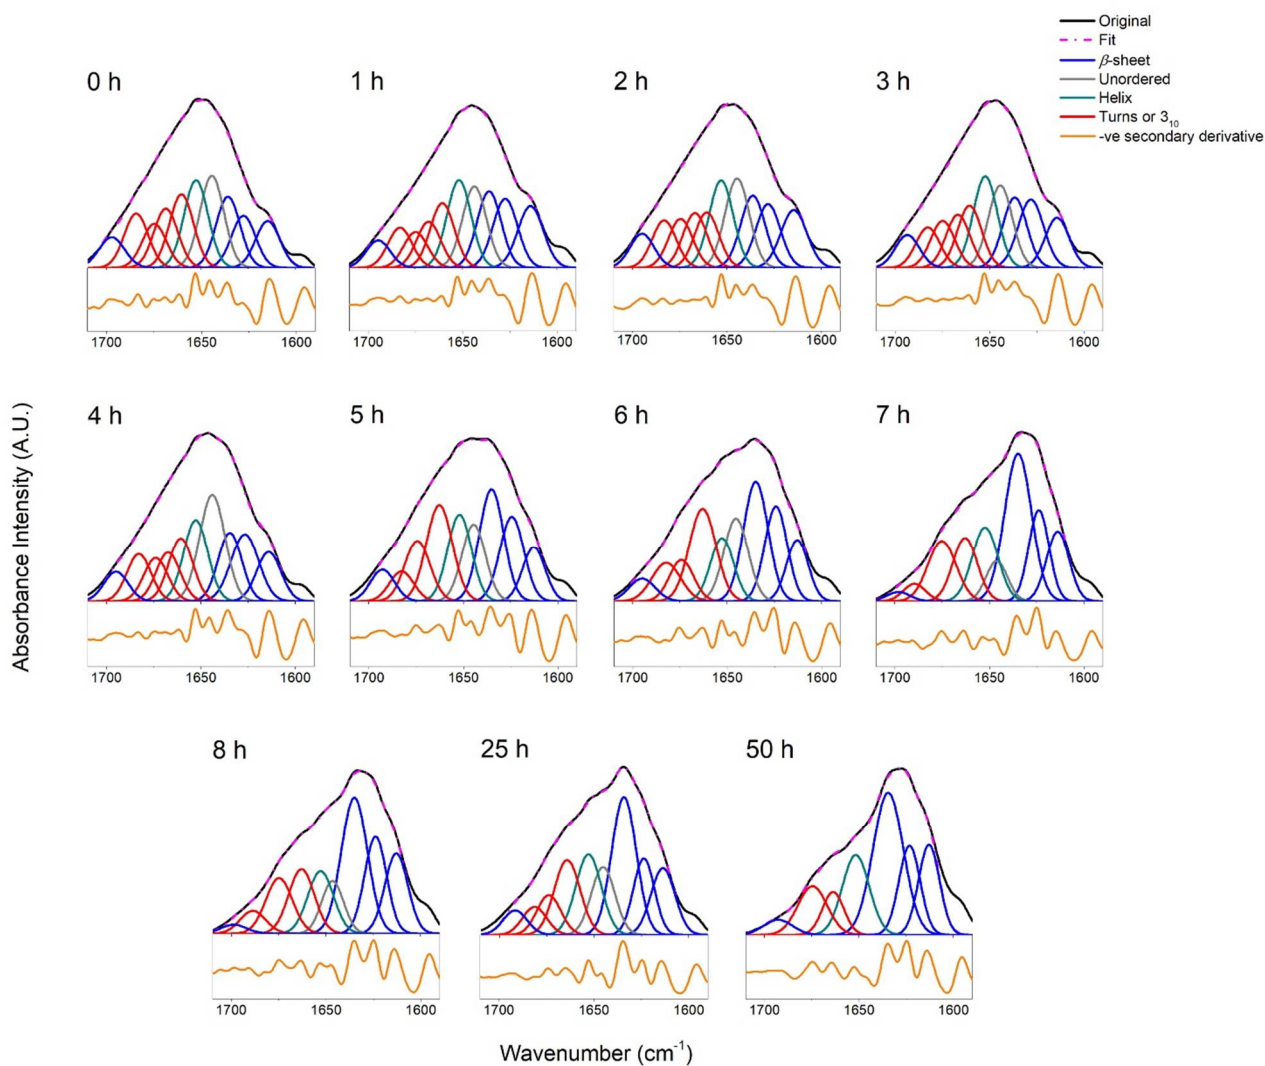

**Figure S5.** Deconvolution of ATR-FTIR spectra of **GV8** self-assembly over a time period of 50 h. Secondary derivatives were obtained to deconvolute the amide I bands of each spectra. FWHM of each fitted peak were kept consistent and positions of peaks were assigned accordingly.

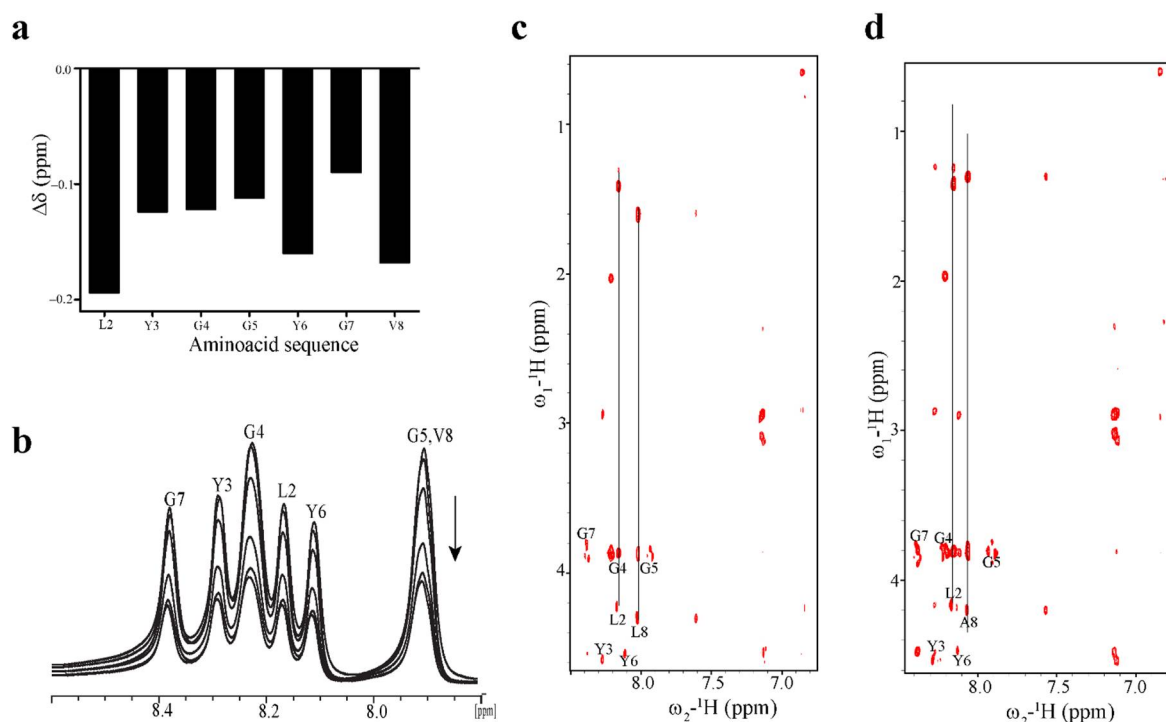

**Figure S6.** Chemical shift deviations (CSD) and gelation of **GV8** and 2D  $^1\text{H}$ - $^1\text{H}$  NOESY spectra of terminal mutated analogs of **GV8**. a) CSD plot of  $\text{H}^\alpha$  values from random coil of **GV8** hydrogel. b) One dimensional  $^1\text{H}$  spectra of 20 mM **GV8** peptide as function of time (every 4 h) for 18 hours. c,d) 2D  $^1\text{H}$ - $^1\text{H}$  NOESY spectra at 0.5 mM peptide concentration of **GL8** (c) and **GA8** (d) peptides indicating the absence of aromatic side chain interactions at 7.5-7.0 ppm.

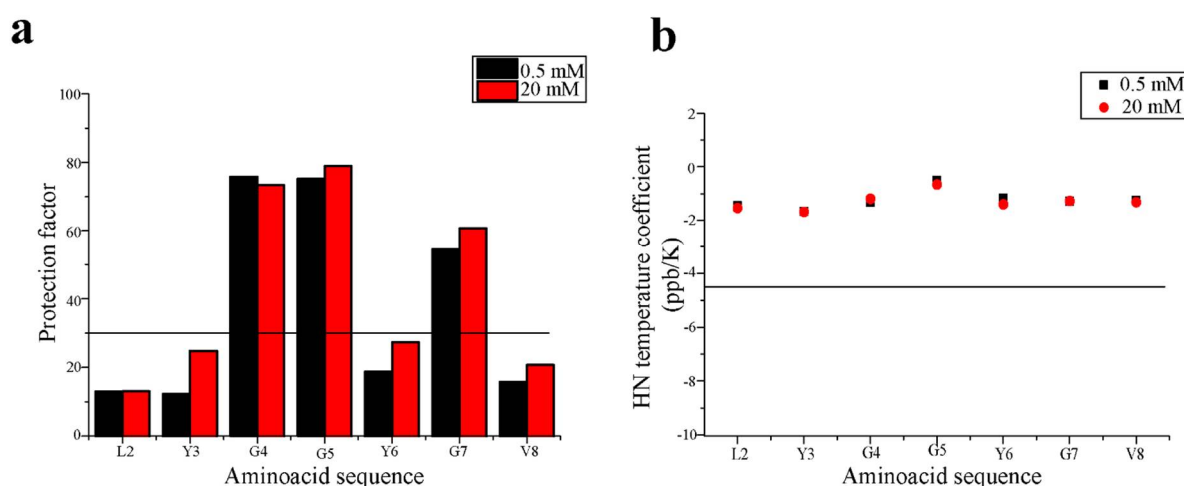

**Figure S7.** Validation of hydrogen bonds stabilization by H/D exchange NMR and Temperature coefficient parameter. a) H/D exchange protection factors for individual residues of **GV8** peptide at 0.5 and 20mM concentrations. b) Amide proton temperature coefficients of individual amino acids of **GV8** peptide at 0.5 and 20 mM concentrations.

**Table S1.** Heat-map summary of secondary structure assignments and their percentage composition from the deconvolution of Amide I peaks of **GV8** peptide over 50 h of incubation.

| Assignment (%)    | 20mM peptide incubation duration |      |      |      |      |      |      |      |      |      |      |
|-------------------|----------------------------------|------|------|------|------|------|------|------|------|------|------|
|                   | 0 h                              | 1 h  | 2 h  | 3 h  | 4 h  | 5 h  | 6 h  | 7 h  | 8 h  | 25 h | 50 h |
| $\beta$ -sheet    | 33.1                             | 40.3 | 37.9 | 37.5 | 36.0 | 43.8 | 46.4 | 54.4 | 54.6 | 49.9 | 65.5 |
| Unordered         | 15.0                             | 13.7 | 14.6 | 13.7 | 18.3 | 11.8 | 13.4 | 6.1  | 8.1  | 11.2 | -    |
| $\alpha$ -Helix   | 14.3                             | 14.7 | 14.1 | 15.2 | 13.1 | 13.4 | 9.7  | 13.5 | 11.2 | 14.3 | 16.4 |
| Turns or $3_{10}$ | 37.6                             | 31.3 | 33.4 | 33.7 | 32.6 | 30.9 | 30.4 | 25.9 | 26.1 | 24.7 | 18.0 |

## Supplementary Movie 1

**GV8** peptide after overnight gelation, illustrating the gel structure and mechanical robustness.
